# Supplementary material
Source: publisher figshare collection journal article supplement (https://karger.figshare.com/ndownloader/files/24903365)
Supplement: Supplementary file 1 [file 24903365]

**Supplement 1: Extreme (far-out) outliers removed from analyses due to plausible over-reporting of leisure-time PA**

| **Study Time Point** | **Standard GLB Group** | **Personalized GLB+LGx Group** |
| --- | --- | --- |
| Baseline | Mod/High PA: n=3; >480 mins/week  METs: n=3; >4677 METs/week | Mod/High PA: None  METs: None |
| 3 Months | Mod/High PA: n=1; 1350 mins/week  METs: n=1; 12150 METs/week | Mod/High PA: None  METs: n=1; 7056 METs/week |
| 6 Months | Mod/High PA: n=2; >545 mins/week  METs: n=2; >2725 METs/week | Mod/High PA: n=1; 2455 mins/week  METs: n=1; 13677 METs/week |
| 12 Months | Mod/High PA: None  METs: None | Mod/High PA: n=1; 960 mins/week  METs: n=1; 4800 METs/week |
